# Supplementary material
Source: Springer Nature journal article supplement (https://www.springermedizin.de/resource/supplementary/12967_2010_660_MOESM8_ESM.pdf/9577230)

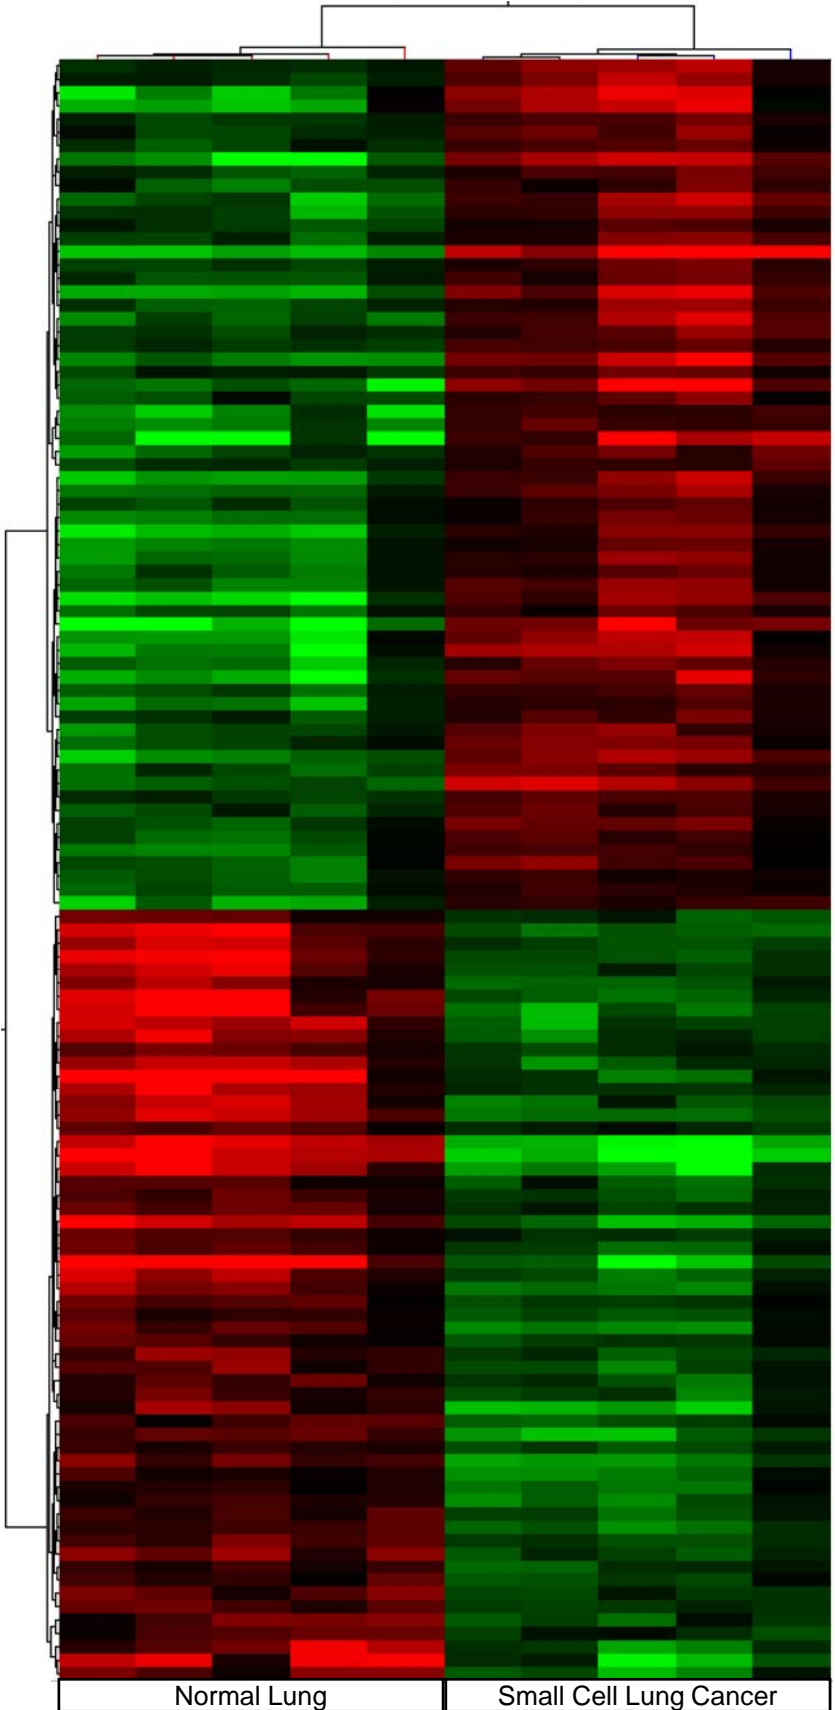

Normal Lung

Small Cell Lung Cancer

Supplement: MOESM8 [file 9577230]
